# Supplementary material
Source: publisher figshare collection journal article supplement (https://tandf.figshare.com/ndownloader/files/13327568)
Supplement: Supplementary file 1 [file 13327568]

**Table S1. Experimental conditions for HPLC-HG-AFS analysis.**

| High performance liquid chromatograph (HPLC) | |
| --- | --- |
| Column | Hamilton PRP-X100 (250 mm×4.1 mm i.d.,10 μm ) |
| Mobile phase | 15 mmol/L (NH4)2HPO4 (pH =6.0 ) |
| Flow rate of mobile phase | 1.2 mL/min |
| Injection volume | 50 μL |

| Hydride generation (HG) | |
| --- | --- |
| KBH4 | 1.5% KBH4 + 0.5% KOH 6ml/min |
| HCl | 10% 6mL/min |

| Atomic fluorescence spectroscopy (AFS) | |
| --- | --- |
| Lamp | Hollow cathode arsenic lamp, 193.7 nm |
| PMT voltage | 280 V |
| Primary current | 90 mA |
| Carrier gas | Argon, 600 mL/min |
